1 Discontinuation of Heart Failure Therapy in patients Undergoing Non-Cardiac surgery: Data  
2 from a Real-world Cohort

3  
4 Malik Elharram MD<sup>1</sup>, Xiaoming Wang PhD,<sup>2</sup> Pishoy Gouda MB BCh BAO<sup>1</sup>Michelle M.Graham  
5 MD<sup>1</sup>

6  
7  
8 [1] University of Alberta, Division of Cardiology and Mazankowski Alberta Heart Institute,  
9 Edmonton, Alberta, Canada

10 [2] Research Facilitation, Alberta Health Services, Edmonton, Alberta, Canada

11  
12  
13  
14  
15  
16  
17

18 **Disclosures:** None

19  
20

21 **Funding:** None

22  
23

24 **Word Count:** 3136

25  
26

27 **Abstract:** 295

28  
29  
30  
31  
32  
33  
34  
35  
36  
37  
38  
39

40 Corresponding author:

41 Dr. Michelle Graham, MD, FRCPC, FCCS

42 Professor of Medicine

43 Mazankowski Alberta Heart Institute,

44 University of Alberta Hospital

45 0A8.32, 8440 112 Street

46 Edmonton, Alberta T6G 2B7 Canada

1 **Abstract**

2 **Background and Aims:** Patients with heart failure (HF) with reduced ejection fraction (HFrEF)  
3 are at high risk for cardiovascular events following non-cardiac surgery. The perioperative  
4 period represents many challenges to maintain guideline directed medical therapy (GDMT). We  
5 examined GDMT use in HFrEF patients following non-cardiac surgery, and the association of  
6 medication changes with cardiovascular outcomes.

7  
8 **Methods:** Using linked administrative databases, a retrospective cohort of HFrEF patients  
9 undergoing major non-cardiac surgery between 2008 and 2020 was formed. Pre-operative use of  
10 GDMT was determined by outpatient prescriptions up to 90 days prior to surgery. Changes in  
11 GDMT was defined as discontinuation or a dose reduction ( $\geq 50\%$ ) of baseline therapies at 90  
12 days after discharge. The primary composite outcome was HF hospitalization or all-cause  
13 mortality at one-year adjusted for age, sex, components of the Revised Cardiac Risk Index and  
14 the Charlson Comorbidity index.

15  
16 **Results:** Of 397,829 index surgeries, there were 7667 (2%) patients with pre-existing HFrEF on  
17 at least one GDMT (50.6% female; mean age: 75 +/- 12 years). At 90 days post-operatively, 46%  
18 of patients had undergone major changes to GDMT. Compared to patients who continued  
19 GDMT, patients with any change to therapy had a higher incidence of the primary outcome (52%  
20 vs. 46%, aOR: 1.14, 95% CI: 1.03-1.25) and all-cause mortality at one year (8.5% vs. 4.9%,  
21 aOR: 1.57, 95% CI: 1.3-1.90).

22

1 **Conclusion:** Among patients with HF<sub>r</sub>EF undergoing major non-cardiac surgery, few are on  
2 optimal GDMT, and perioperative changes to GDMT is associated with higher odds for HF  
3 hospitalization or death.

4  
5  
6  
7

8 **Key Words:** Heart failure, perioperative, non-cardiac surgery, guideline directed medical  
9 therapy

10  
11

## 1 **Introduction**

2  
3 Heart failure (HF) is highly prevalent among older adults undergoing non-cardiac  
4 surgery, and with a rising elderly population with underlying cardiovascular risk, this estimate is  
5 projected to continue to increase.<sup>1</sup> HF is an established independent risk factor for adverse  
6 perioperative outcomes and is associated with a three to five-fold increase in perioperative  
7 mortality.<sup>2,3</sup> Patients with HF with reduced ejection fraction (HFrEF) are a subset of patients at  
8 higher risk, and depressed left ventricular ejection fraction is an important predictor of adverse  
9 cardiovascular outcomes following surgery.<sup>4</sup> Guideline directed medical therapy (GDMT)  
10 including a beta blocker (BB), renin angiotensin system inhibitor (RASi), mineralocorticoid  
11 receptor antagonist (MRA), and recently a sodium glucose co-transporter 2 inhibitor (SGLT-2i),  
12 improve morbidity and mortality in HFrEF,<sup>5-10</sup> yet their utilization in the perioperative period  
13 remains unclear.

14 The pathogenesis of cardiovascular events in the perioperative period results from focal  
15 surgical or anesthetic triggers that initiate inflammatory, hypercoagulable, and hypoxic states,<sup>11</sup>  
16 which may lead to decompensation in patients with pre-existing HFrEF. Furthermore, post-  
17 operative hypotension and renal failure may lead to challenges in reinitiating or continuing  
18 GDMT, which may worsen short and long-term HF outcomes. In prior studies of non-surgical  
19 hospitalized patients with HFrEF, discontinuation of RASi, BB or MRA at discharge was  
20 associated with an increased risk for HF readmission, and short and long-term mortality.<sup>12-14</sup>

21 The perioperative period represents many challenges to maintain guideline directed  
22 medical therapy (GDMT) in HFrEF patients following major surgery. We aim to examine the  
23 contemporary use of GDMT for HFrEF following non-cardiac surgery, and the association of  
24 changes to these therapies with HF related outcomes.

## 1 **Methods**

2 **Data Source:** A population-based cohort of patients who underwent non-cardiac surgery in the  
3 province of Alberta, Canada was formed, which has previously been described.<sup>15</sup> The dataset  
4 was created by linking 5 administrative databases in Alberta using each patients' provincial  
5 health number: (1) Alberta Inpatient Discharge Abstract Database, which includes information  
6 on all admissions to acute care facilities including admission diagnosis and inpatient surgical  
7 procedures; (2) the Pharmaceutical Information Network (PIN) database, which includes records  
8 of every individual's active and previous prescription outpatient medications in Alberta,  
9 regardless of coverage. Over the counter medications are not captured in this database; (3) the  
10 Alberta Health Care Practitioner Claims Database, which includes physician claims for  
11 outpatient services; (4) Alberta Registry data, in which deaths are recorded; and (5) the Alberta  
12 Health Services Laboratory database, which is the repository for all inpatient and outpatient  
13 laboratory investigations.

14  
15 **Population selection:** We identified a cohort of surgical patients with pre-existing HF<sub>r</sub>EF who  
16 were discharged alive following hospitalization for major non-cardiac surgery in Alberta. We  
17 examined patients admitted for major surgical procedures pertaining to intrathoracic,  
18 orthopaedic, intraperitoneal, vascular, and pelvic surgeries (**Supplementary Table 1**) If an  
19 individual underwent >1 surgical procedure during the study period, only the first surgery was  
20 used. Patients needed to have filled a prescription for either a RASi (angiotensin converting  
21 enzyme inhibitor, angiotensin receptor blocker, or angiotensin receptor-neprilysin inhibitor), BB,  
22 or MRA within 90 days (to account for stockpile medications) prior to surgery. We did not  
23 consider the use of SGLT-2i as our cohort preceded the widespread adoption of these

1 medications into HF guidelines. Surgical procedures were identified using ICD-9-CM and CCI  
2 procedural codes, as per our prior study.<sup>15</sup> We excluded patients undergoing cardiac or minor  
3 surgical procedures. Patients with HFrEF were defined as having at least 1 inpatient admission or  
4 at least 2 outpatient clinic visits with diagnosis of HFrEF by ICD code within 5 years of surgery  
5 (*ICD-9-CM* or *ICD-10-CM*) codes 428.2 or I50.2 (systolic HF) or 428.4 or I50.4 (combined  
6 systolic and diastolic HF).<sup>16</sup>

7  
8 **Exposure:** The exposure group was based on continuation of preoperative doses of GDMT (BB,  
9 RASi, and/or MRA) compared to changes to therapy, which were defined as either  
10 discontinuation or dose reduction of therapy. Baseline use of GDMT was defined as a  
11 medication that was dispensed within 90 days prior to admission for surgery to account for  
12 stockpiled medication. Continuation status was defined as patients having a record of an  
13 outpatient prescription filled within 90 days following discharge from non-cardiac surgery. 90-  
14 days was used as our threshold as that is the longest interval that a pharmacy can dispense  
15 medications in our jurisdiction. Our secondary exposure was a dose reduction of HF therapy,  
16 defined as a  $\geq 50\%$  reduction in dose from baseline, within 90 days following discharge. Data on  
17 medication use were extracted from the pharmaceutical information network (PIN) database.

18  
19 **Covariates:** Baseline comorbidities were obtained from the discharge abstract database using  
20 International Classification of Diseases, Tenth Revision codes (**Supplementary Table 2**). This  
21 included components of the Revised Cardiac Risk Index (RCRI) score<sup>17</sup> (1) history of ischemic  
22 heart disease; (2) heart failure; (3) stroke or transient ischemic attack; (4) insulin-treated  
23 diabetes; (5) creatinine  $\geq 177$   $\mu\text{mol/L}$  (from most recent creatinine in the Alberta Health Services

1 Laboratory database); and (6) high-risk surgery (intrathoracic, vascular, and intraperitoneal). Pre-  
2 operative BNP and post-operative creatinine were further obtained from the Alberta Health  
3 Services Laboratory database. We also included any prior history of atrial fibrillation, type 1 or  
4 type 2 diabetes mellitus, hypertension, dyslipidemia, and components of the Charlson  
5 comorbidity index.<sup>18</sup>

6  
7 **Outcomes:** Our primary outcome was a composite of all-cause mortality or hospitalization for  
8 HF at one year. HF hospitalization was defined as an inpatient admission for HF using a hospital  
9 inpatient record using ICD-10 codes (I50, I110). Vital status was obtained from the Alberta  
10 registry. Patients were followed from the date of cohort entry (90 days after discharge from non-  
11 cardiac surgery) until the occurrence of the outcome of interest or until the end of follow-up at  
12 one year.

13  
14 **Statistical analysis:** Descriptive analysis compared baseline characteristics of patients who  
15 continued GDMT without any changes, compared to patients who underwent changes (either  
16 discontinuation or dose reduction) using mean and standard deviation (SD) for continuous  
17 variables and frequency distribution for categorical variables. We stratified changes in GDMT  
18 based on their baseline use of either one, two or all three GDMT prior to non-cardiac surgery. A  
19 logistic regression model was used to examine predictors of changes in GDMT. We estimated an  
20 adjusted odds ratio with 95% CI to assess the one-year odds for readmission for HF or all-cause  
21 mortality, adjusted for: age, sex, components of RCRI risk score (history of ischemic heart  
22 disease, stroke or TIA, insulin treated diabetes, AKI (Cr >177) and high-risk surgery) and

1 Charlson comorbidity index. SAS Enterprise Guide 8.3 (SAS Institute) was used for all statistical  
2 analyses.

### 3 **Results**

#### 4 **Baseline characteristics**

5 From October 1<sup>st</sup>, 2008 - September 30<sup>th</sup>, 2020, there were 552,224 surgeries performed  
6 in the province of Alberta, which included 397,829 major non-cardiac surgical procedures. Of  
7 those, we identified 7667 (1.9%) patients with a diagnosis of HFrEF who were on at least one  
8 class of GDMT prior to surgery (RASi, BB, or MRA) (**Supplementary Figure 1**). The mean age  
9 of patients were 75 years +/-12.3 years and 51.7% were female. The most common surgical  
10 procedures performed were orthopaedic in 4067 (53%) followed by intraperitoneal 2475 (32%)  
11 and pelvic 699 (9%). Following major non-cardiac surgery, 3546 patients (46%) experienced  
12 changes to baseline GDMT, which included discontinuation of at least one class of medication in  
13 2334 (30%) or dose reduction >50% in a further 1212 (16%) patients. Individuals who had there  
14 HF therapy discontinued or dose reduced were more likely to be older, female, and have a higher  
15 prevalence of chronic kidney disease, cerebral vascular disease, atrial fibrillation/flutter, or HF  
16 hospitalization within the prior year. Pre and post operative creatinine and pre-operative BNP  
17 (where available) were higher amongst patients who underwent changes to GDMT (**Table 1**).

18

#### 19 **Guideline Directed Medical Therapy Utilization**

20 Overall, 5724 (74%) of patients with HFrEF were on monotherapy with GDMT prior to  
21 non-cardiac surgery. For patients on monotherapy, the most common GDMT class was a RASi  
22 (87%), followed by an MRA (8%), and a beta blocker (5%). Two agents were used in 1631  
23 (21%) of patients prior to non-cardiac surgery, with the most common combination being a



1 RASi+ MRA (54%), followed by a BB + RASi (41%). Only 312 (4%) of patients were on triple  
2 therapy (**Table 2 & Supplementary Table 3**). At 90 days following major non-cardiac surgery,  
3 4131 (72.2%) of patients on one, 1019 (62.5%) on two, and 183 (58.7%) on all three GDMT  
4 classes continued their medications without changes. For patients on monotherapy, an MRA was  
5 the most frequently discontinued therapy after surgery in 150 patients (34%) of prior users. For  
6 patients on dual therapy, a BB + MRA and a RASi + MRA were more likely to have  
7 discontinued at least one medication during follow up. For patients on triple therapy at baseline,  
8 129 (42%) of patients discontinued at least one therapy.

9 Dose reduction of HF therapy occurred in 906 (22%) on one therapy, 264 (26%) on two  
10 therapies, and 42 (22%) of patients on three therapies. For patients on monotherapy, the most  
11 common medication to undergo a dose reduction was an MRA in 68 patients (24%). For patients  
12 on dual therapy the most common combination to undergo a dose reduction of at least one  
13 therapy was a BB+ MRA (28%) followed by a RASi+ MRA (26%) (**Table 3 & Supplementary**  
14 **Table 4**). Factors associated with discontinuation or dose reduction to GDMT therapy at follow-  
15 up included older age, prior history of atrial fibrillation/flutter, heart failure admission in the  
16 prior year, orthopaedic surgery, and elevation in preoperative BNP and post operative creatinine  
17 (**Table 4**).

18

## 19 **Clinical Events**

20 At one year follow-up, the composite of either HF hospitalization or death occurred in  
21 3782 (49.3%) of patients. Compared to patients who continued GDMT, patients with any change  
22 to therapy had a higher incidence of the primary outcome (52% vs. 47%, aOR: 1.14, 95% CI:  
23 1.04-1.25). Medication changes to patients on one and three therapies were associated with an

1 increased odds for the primary outcome (one therapy: 52% vs. 48%, aOR: 1.13 (1.01-1.25); three  
2 therapies: 56% vs. 36%, aOR: 1.9, 95% CI: 1.17-3.1). Medication changes to patients on two  
3 therapies at baseline was not associated with an increased odds for the primary outcome (aOR:  
4 1.07, 95% CI: 0.88-1.31) (**Table 5**). Overall, 504 (7%) of patients died within one year following  
5 non-cardiac surgery. Compared to patients who continued their GDMT, patients with any change  
6 to GDMT had significant risk of mortality (8.5% vs. 4.9%, aOR: 1.57, 95% CI: 1.30-1.90).  
7 Mortality was significantly higher in patients who underwent changes to one therapy (aOR: 1.55,  
8 95% CI: 1.24-1.93), but without any significant difference in patients on two and three therapies,  
9 albeit a low number of events (**Supplementary Table 5**).

10  
11  
12

## 1 **Discussion**

2

3           In this large retrospective cohort of patients with HFrEF undergoing major non-cardiac  
4 surgery we observed that patients with HFrEF demonstrate a high rate of major cardiovascular  
5 events, with one in two being admitted for a heart failure exacerbation or death. Few patients  
6 with HFrEF are on optimal GDMT prior to surgery (4%) and nearly half of patients underwent  
7 significant dose reductions/discontinuation of GDMT in the peri-operative period. These changes  
8 to GDMT were associated with higher odds for HF hospitalization or mortality at one year.  
9 Together, our findings identify important real-world gaps in GDMT utilization in HFrEF patients  
10 following major surgery and emphasize the need for careful perioperative assessment and  
11 monitoring, and close outpatient follow-up to improve treatment in line with current guideline  
12 recommendations.<sup>19-21</sup>

13           Pre-existing HF is among the most significant risk factors for perioperative  
14 cardiovascular complications. In an analysis of 23,340 chronic heart failure patients undergoing  
15 major non-cardiac surgery, the risk adjusted mortality within 30 days of surgery was 11.7% for  
16 patients with pre-existing HF compared to 6.6% for patients with coronary artery disease.<sup>22</sup>  
17 Furthermore, there is a graded risk in patients with a lower left ventricular ejection fraction (EF).  
18 In a cohort of patients with chronic HF undergoing non-cardiac surgery, the 90-day postoperative  
19 mortality rate was lowest amongst patients with preserved EF (4.88%) and highest in patients  
20 with an EF of 30-39% (6.58%) and an EF of <30 % (8.34%).<sup>23</sup> The elevated risk for poor  
21 outcomes extends beyond the perioperative period, with a cohort of patients with chronic HF  
22 undergoing elective or emergency surgery in Sweden demonstrating a one-year mortality of 16%  
23 for elective surgery and 39% for emergency surgery.<sup>24</sup> Consistent with prior studies, we found  
24 that nearly half of patients with HFrEF undergoing major non-cardiac surgery were hospitalized

1 for HF or died within the year following surgery. The long-term risk of cardiovascular events  
2 following surgery was comparable to data from patients admitted with a HF exacerbation,<sup>25,26</sup>  
3 which remains one of the poorest prognostic factors in HF patients.<sup>27</sup> Admission for major  
4 surgery in patients with HFrEF may signify an important clinical event akin to a HF  
5 hospitalization that requires careful clinical assessment and diligent outpatient follow-up.

6 While evidence from several landmark clinical trials have demonstrated the effectiveness  
7 of pharmacological therapy in improving morbidity and mortality in patients HFrEF,<sup>5-10</sup> we  
8 noted a low proportion of patients on adequate (triple therapy) GDMT prior to non-cardiac  
9 surgery. Our findings appear to be consistent with studies done in the real-world setting, where  
10 GDMT in patients with HFrEF has been shown to be lower than levels achieved in clinical trials.  
11 In a retrospective observational study of 17,106 patients with HFrEF with an incident HF  
12 hospitalization, 23% of patients were not on any HF therapy on admission and only 13% were on  
13 triple therapy.<sup>13</sup> Similarly in a large Canadian cohort of HFrEF, only 20% of patients were on  
14 triple therapy at 6 months following an index hospitalization for HF, and only 8.3% achieved  
15 optimal GDMT dose.<sup>28</sup> Utilization of GDMT within our cohort was lower than these  
16 observational studies (only 4% on triple therapy), and may be related to an older cohort with  
17 more comorbidities, and more advanced HF. Additionally, roughly one third of patients in our  
18 cohort did not have a recent HF hospitalization, which is an important triggering event for  
19 medication assessment and titration.<sup>29</sup> While current perioperative guidelines recommend  
20 adequate optimization of GDMT in HFrEF prior to elective major non-cardiac surgery,<sup>30</sup> our  
21 findings from a generalizable non-cardiac surgical cohort suggest underperformance in the real-  
22 world setting.

1           We also found that significant changes to GDMT occurred in HF<sub>r</sub>EF patients following  
2 non-cardiac surgery. In our cohort, nearly one-half of patients experienced discontinuation or  
3 dose-reduction of therapy at 90 days following discharge. Hemodynamic or biochemical changes  
4 in the perioperative period may provide barriers to restarting or initiating GDMT in this  
5 population. Perioperative acute kidney injury (AKI) occurs between 6.3-13.4% of patients  
6 undergoing major non-cardiac surgery,<sup>31</sup> and the presence of pre-existing HF further increases  
7 this risk.<sup>32</sup> Additionally, multiple perioperative factors may lead to disruption of potassium  
8 homeostasis leading to hyperkalemia.<sup>33</sup> Renal dysfunction and hyperkalemia in the perioperative  
9 setting may lead to hesitancy to restarting a RASi or an MRA. Indeed, within our cohort, an  
10 MRA or RASi were the most frequent medications to undergo changes or discontinuation, and  
11 pre-existing chronic kidney disease and postoperative creatinine were among the strongest  
12 predictors for changes in therapy. Furthermore, hypotension from the effects of anesthetic and  
13 analgesic agents, shifts in fluid balance, or bleeding may further serve as a barrier to continuing  
14 or restarting therapy. Our analysis also identified that age, renal dysfunction, underlying atrial  
15 fibrillation, and more advanced HF (higher BNP and recent HF admission) were associated with  
16 changes to GDMT. Under-titration and discontinuation of GDMT are known to occur more  
17 frequently in elderly patients with increased medical comorbidities,<sup>34</sup> despite the robust benefit  
18 demonstrated in this population.<sup>35</sup> This further illustrates the risk-treatment paradox in HF, where  
19 patients with the greatest need for GDMT are paradoxically the least likely to receive appropriate  
20 therapy.

21           Discontinuation or dose reduction of GDMT in HF<sub>r</sub>EF patients following surgery was  
22 associated with adverse outcomes, including a 14% increased odds for HF hospitalization or  
23 mortality at one year. This association appeared to be strongest in the subgroup of patients who

1 were preoperatively treated with triple therapy, where HFrEF patients have been shown to  
2 achieve the most clinical benefit.<sup>36</sup> Furthermore, we found that changes in GDMT were  
3 associated with a 57% increase in all-cause mortality at one year. This is consistent with prior  
4 observational studies suggesting worsening clinical outcomes in HF patients who discontinued  
5 GDMT following admission for HF.<sup>12-14</sup> In a large observational study of patients admitted with  
6 decompensated HF, discontinuation of GDMT, including ACE inhibitors/ARBs, beta-blockers,  
7 and MRAs, were associated with a 30% increase in 1-year all-cause mortality compared with  
8 maintaining GDMT.<sup>37</sup> Similarly in an analysis from the Get With The Guidelines-Heart Failure  
9 Registry, discontinuation of ACEi/ARB among patients hospitalized for HFrEF was associated  
10 with a significantly higher 90-day and 1-year mortality and 30-day HF readmission compared to  
11 those who continued therapy.<sup>14</sup> Finally, doses of GDMT below the target recommended by  
12 clinical trials<sup>5-10</sup> have been associated with poorer outcomes.<sup>38</sup> Our results extend these prior  
13 observations to a non-cardiac surgical HFrEF population, and further illustrate the harm that  
14 discontinuation or dose reduction of GDMT may have on long-term clinical outcomes.

15 Our findings demonstrate important limitations in the contemporary management of  
16 HFrEF patients undergoing major non-cardiac surgery and emphasize the need for a coordinated  
17 and multidisciplinary approach to care and follow-up of this high-risk cohort. Following surgery,  
18 patients with HFrEF may benefit from a multidisciplinary care model between surgery,  
19 anesthesia, and cardiology/internal medicine to ensure adequate clinical assessment of  
20 hemodynamics, volume status, and biochemistry to target early re-initiation of GDMT. The  
21 perioperative setting may further serve as a key opportunity to address gaps in medical therapy  
22 including initiation, titration or switching of therapies prior to discharge. It remains imperative  
23 that HFrEF patients have early follow-up with an outpatient specialist for reassessment of

1 clinical status and consideration for early medication reinitiation/titration, to improve treatment  
2 in keeping with guideline recommendations.<sup>19-21</sup>

### 3 **Limitations**

4 The present results should be taken in the context of several limitations. As this was an  
5 administrative dataset, we were unable to capture echocardiographic measures of EF or  
6 functional class as markers of more advanced HF. However, the use of ICD-10 codes for patients  
7 with HFrEF, has been recently shown to accurately identify patients with reduced ejection  
8 fraction when defined as an EF <50%.<sup>39</sup> Furthermore, we were unable to capture the rationale for  
9 discontinuation or dose reduction to therapy. Although we attempted to adjust for clinically  
10 important comorbidities in the relationship between changes in therapy and outcomes, the  
11 possibility for residual and unmeasured confounding exists. Finally given the period of study  
12 (2008-2020) our cohort predates the widespread use of SGLT-2i into HF guidelines, and we  
13 therefore did not consider the use these classes of medications in our study.

### 15 **Conclusion**

16 In conclusion, among a generalizable cohort of patients with HFrEF undergoing major  
17 non-cardiac surgery, few (4%) are on optimal GDMT pre-operatively. Furthermore roughly half  
18 of patients with HFrEF will undergo further significant reductions in their GDMT post-  
19 operatively. These deleterious perioperative changes to GDMT are associated a 14% increased  
20 risk of HF hospitalization and all-cause mortality. Our findings confirm the need for careful  
21 multidisciplinary perioperative assessment and early outpatient follow-up to improve treatment  
22 and outcomes in this high-risk population.

23  
24

1 **References:**

- 2 [1] Hammill, B. G., Curtis, L. H., Bennett-Guerrero, E., O'Connor, C. M., Jollis, J. G., Schulman,  
3 K. A., & Hernandez, A. F. (2008). Impact of heart failure on patients undergoing major  
4 noncardiac surgery. *The Journal of the American Society of Anesthesiologists*, *108*(4), 559-567.  
5
- 6 [2] van Diepen, S., Bakal, J. A., McAlister, F. A., & Ezekowitz, J. A. (2011). Mortality and  
7 readmission of patients with heart failure, atrial fibrillation, or coronary artery disease  
8 undergoing noncardiac surgery: an analysis of 38 047 patients. *Circulation*, *124*(3), 289-296.  
9
- 10 [3] Patel, A. Y., Eagle, K. A., & Vaishnava, P. (2015). Cardiac risk of noncardiac  
11 surgery. *Journal of the American College of Cardiology*, *66*(19), 2140-2148.  
12
- 13 [4] Huang, Y. Y. C., Chen, L., & Wright, J. D. (2022). Comparison of Perioperative Outcomes in  
14 Heart Failure Patients With Reduced Versus Preserved Ejection Fraction After Noncardiac  
15 Surgery. *Annals of Surgery*, *275*(4), 807-815.  
16
- 17 [5] Pfeffer, M. A., McMurray, J. J., Velazquez, E. J., Rouleau, J. L., Køber, L., Maggioni, A. P.,  
18 ... & Califf, R. M. (2003). Valsartan, captopril, or both in myocardial infarction complicated by  
19 heart failure, left ventricular dysfunction, or both. *New England Journal of Medicine*, *349*(20),  
20 1893-1906.  
21
- 22 [6] McMurray, J. J., Packer, M., Desai, A. S., Gong, J., Lefkowitz, M. P., Rizkala, A. R., ... &  
23 Zile, M. R. (2014). Angiotensin–neprilysin inhibition versus enalapril in heart failure. *N Engl J*  
24 *Med*, *371*, 993-1004.  
25
- 26 [7] Packer, M., Fowler, M. B., Roecker, E. B., Coats, A. J., Katus, H. A., Krum, H., ... &  
27 DeMets, D. L. (2002). Effect of carvedilol on the morbidity of patients with severe chronic heart  
28 failure: results of the carvedilol prospective randomized cumulative survival (COPERNICUS)  
29 study. *Circulation*, *106*(17), 2194-2199.  
30
- 31 [8] Pitt, B., Zannad, F., Remme, W. J., Cody, R., Castaigne, A., Perez, A., ... & Wittes, J. (1999).  
32 The effect of spironolactone on morbidity and mortality in patients with severe heart failure. *New*  
33 *England Journal of Medicine*, *341*(10), 709-717.  
34
- 35 [9] McMurray, J. J., Solomon, S. D., Inzucchi, S. E., Køber, L., Kosiborod, M. N., Martinez, F.  
36 A., ... & Langkilde, A. M. (2019). Dapagliflozin in patients with heart failure and reduced  
37 ejection fraction. *New England Journal of Medicine*, *381*(21), 1995-2008.  
38
- 39 [10] Cole, G. D., Patel, S. J., Zaman, N., Barron, A. J., Raphael, C. E., Mayet, J., & Francis, D.  
40 P. (2014). “Triple therapy” of heart failure with angiotensin-converting enzyme inhibitor, beta-  
41 blocker, and aldosterone antagonist may triple survival time: shouldn't we tell patients?. *JACC:*  
42 *Heart Failure*, *2*(5), 545-548.  
43
- 44 [11] Smilowitz, N. R., & Berger, J. S. (2016). Perioperative management to reduce cardiovascular  
45 events. *Circulation*, *133*(11), 1125-1130.  
46



- 1 [12] Gilstrap, L. G., Fonarow, G. C., Desai, A. S., Liang, L., Matsouaka, R., DeVore, A. D., ... &  
2 Bhatt, D. L. (2017). Initiation, continuation, or withdrawal of angiotensin-converting enzyme  
3 inhibitors/angiotensin receptor blockers and outcomes in patients hospitalized with heart failure  
4 with reduced ejection fraction. *Journal of the American Heart Association*, 6(2), e004675.  
5
- 6 [13] Wirtz, H. S., Sheer, R., Honarpour, N., Casebeer, A. W., Simmons, J. D., Kurtz, C. E., ... &  
7 Globe, G. (2020). Real-world analysis of guideline-based therapy after hospitalization for heart  
8 failure. *Journal of the American Heart Association*, 9(16), e015042.  
9
- 10 [14] Bhagat, A. A., Greene, S. J., Vaduganathan, M., Fonarow, G. C., & Butler, J. (2019).  
11 Initiation, continuation, switching, and withdrawal of heart failure medical therapies during  
12 hospitalization. *JACC: Heart Failure*, 7(1), 1-12.  
13
- 14 [15] Gouda, P., Wang, X., McGillion, M., & Graham, M. M. (2021). Underutilization of  
15 perioperative screening for cardiovascular events after noncardiac surgery in Alberta. *Canadian*  
16 *Journal of Cardiology*, 37(1), 57-65.  
17
- 18 [16] Butler, J., Djatche, L. M., Sawhney, B., Chakladar, S., Yang, L., Brady, J. E., & Yang, M.  
19 (2020). Clinical and economic burden of chronic heart failure and reduced ejection fraction  
20 following a worsening heart failure event. *Advances in therapy*, 37(9), 4015-4032.  
21
- 22 [17] Ford, M. K., Beattie, W. S., & Wijeyesundera, D. N. (2010). Systematic review: prediction of  
23 perioperative cardiac complications and mortality by the revised cardiac risk index. *Annals of*  
24 *internal medicine*, 152(1), 26-35.  
25
- 26 [18] Charlson, M., Szatrowski, T. P., Peterson, J., & Gold, J. (1994). Validation of a combined  
27 comorbidity index. *Journal of clinical epidemiology*, 47(11), 1245-1251.  
28
- 29 [19] McDonald, M., Virani, S., Chan, M., Ducharme, A., Ezekowitz, J. A., Giannetti, N., ... &  
30 Yip, A. M. C. (2021). CCS/CHFS heart failure guidelines update: defining a new pharmacologic  
31 standard of care for heart failure with reduced ejection fraction. *Canadian Journal of*  
32 *Cardiology*, 37(4), 531-546.  
33
- 34 [20] Heidenreich, P. A., Bozkurt, B., Aguilar, D., Allen, L. A., Byun, J. J., Colvin, M. M., ... &  
35 Yancy, C. W. (2022). 2022 AHA/ACC/HFSA guideline for the management of heart failure: a  
36 report of the American College of Cardiology/American Heart Association Joint Committee on  
37 Clinical Practice Guidelines. *Journal of the American College of Cardiology*, 79(17), e263-e421.  
38
- 39 [21] McDonagh, T. A., Metra, M., Adamo, M., Gardner, R. S., Baumbach, A., Böhm, M., ... &  
40 Kathrine Skibelund, A. (2021). 2021 ESC Guidelines for the diagnosis and treatment of acute  
41 and chronic heart failure: Developed by the Task Force for the diagnosis and treatment of acute  
42 and chronic heart failure of the European Society of Cardiology (ESC) With the special  
43 contribution of the Heart Failure Association (HFA) of the ESC. *European heart journal*, 42(36),  
44 3599-3726.  
45

- 1 [22] Hernandez, A. F., Whellan, D. J., Stroud, S., Sun, J. L., O'Connor, C. M., & Jollis, J. G.  
2 (2004). Outcomes in heart failure patients after major noncardiac surgery. *Journal of the*  
3 *American College of Cardiology*, 44(7), 1446-1453.  
4
- 5 [23] Lerman, B. J., Popat, R. A., Assimes, T. L., Heidenreich, P. A., & Wren, S. M. (2019).  
6 Association of left ventricular ejection fraction and symptoms with mortality after elective  
7 noncardiac surgery among patients with heart failure. *Jama*, 321(6), 572-579.  
8
- 9 [24] Faxén, U. L., Hallqvist, L., Benson, L., Schrage, B., Lund, L. H., & Bell, M. (2020). Heart  
10 failure in patients undergoing elective and emergency noncardiac surgery: Still a poorly  
11 addressed risk factor. *Journal of Cardiac Failure*, 26(12), 1034-1042.  
12
- 13 [25] Parizo, J. T., Kohsaka, S., Sandhu, A. T., Patel, J., & Heidenreich, P. A. (2020). Trends in  
14 readmission and mortality rates following heart failure hospitalization in the Veterans Affairs  
15 Health Care System from 2007 to 2017. *JAMA cardiology*, 5(9), 1042-1047.  
16
- 17 [26] Gupta, A., Allen, L. A., Bhatt, D. L., Cox, M., DeVore, A. D., Heidenreich, P. A., ... &  
18 Fonarow, G. C. (2018). Association of the hospital readmissions reduction program  
19 implementation with readmission and mortality outcomes in heart failure. *JAMA*  
20 *cardiology*, 3(1), 44-53.  
21
- 22 [27] Ho, K. K., Anderson, K. M., Kannel, W. B., Grossman, W., & Levy, D. (1993). Survival  
23 after the onset of congestive heart failure in Framingham Heart Study  
24 subjects. *Circulation*, 88(1), 107-115.  
25
- 26 [28] Wahid, M., Aghanya, V., Sepehrvand, N., Dover, D. C., Kaul, P., & Ezekowitz, J. (2022).  
27 Use of Guideline-Directed Medical Therapy in Patients Aged  $\geq 65$  Years After the Diagnosis of  
28 Heart Failure: A Canadian Population-Based Study. *CJC open*, 4(12), 1015-1023.  
29
- 30 [29] Srivastava, P. K., DeVore, A. D., Hellkamp, A. S., Thomas, L., Albert, N. M., Butler, J., ...  
31 & Fonarow, G. C. (2021). Heart failure hospitalization and guideline-directed prescribing  
32 patterns among heart failure with reduced ejection fraction patients. *Heart Failure*, 9(1), 28-38.  
33
- 34 [30] Halvorsen, S., Mehilli, J., Cassese, S., Hall, T. S., Abdelhamid, M., Barbato, E., ... & Touyz,  
35 R. M. (2022). 2022 ESC Guidelines on cardiovascular assessment and management of patients  
36 undergoing non-cardiac surgery: Developed by the task force for cardiovascular assessment and  
37 management of patients undergoing non-cardiac surgery of the European Society of Cardiology  
38 (ESC) Endorsed by the European Society of Anaesthesiology and Intensive Care  
39 (ESAIC). *European heart journal*, 43(39), 3826-3924.  
40
- 41 [31] Shaw, A. D., Khanna, A. K., Smischney, N. J., Shenoy, A. V., Boero, I. J., Bershad, M., ...  
42 & Stapelfeldt, W. H. (2022). Intraoperative hypotension is associated with persistent acute  
43 kidney disease after noncardiac surgery: a multicentre cohort study. *British Journal of*  
44 *Anaesthesia*.  
45

- 1 [32] Thakar, C. V., Arrigain, S., Worley, S., Yared, J. P., & Paganini, E. P. (2005). A clinical  
2 score to predict acute renal failure after cardiac surgery. *Journal of the American Society of*  
3 *Nephrology*, 16(1), 162-168.  
4
- 5 [33] Ayach, T., Nappo, R. W., Paugh-Miller, J. L., & Ross, E. A. (2015). Postoperative  
6 hyperkalemia. *European Journal of Internal Medicine*, 26(2), 106-111.  
7
- 8 [34] Fiuzat, M., Ezekowitz, J., Alemayehu, W., Westerhout, C. M., Sbolli, M., Cani, D., ... &  
9 O'Connor, C. M. (2020). Assessment of limitations to optimization of guideline-directed medical  
10 therapy in heart failure from the GUIDE-IT trial: a secondary analysis of a randomized clinical  
11 trial. *JAMA cardiology*, 5(7), 757-764.  
12
- 13 [35] Seo, W. W., Park, J. J., Park, H. A., Cho, H. J., Lee, H. Y., Kim, K. H., ... & Choi, D. J.  
14 (2020). Guideline-directed medical therapy in elderly patients with heart failure with reduced  
15 ejection fraction: a cohort study. *BMJ open*, 10(2), e030514.  
16
- 17 [36] Burnett, H., Earley, A., Voors, A. A., Senni, M., McMurray, J. J., Deschaseaux, C., & Cope,  
18 S. (2017). Thirty years of evidence on the efficacy of drug treatments for chronic heart failure  
19 with reduced ejection fraction: a network meta-analysis. *Circulation: Heart Failure*, 10(1),  
20 e003529.  
21
- 22 [37] Tran, R. H., Aldemerdash, A., Chang, P., Sueta, C. A., Kaufman, B., Asafu-adjei, J., ... &  
23 Rodgers, J. E. (2018). Guideline-directed medical therapy and survival following hospitalization  
24 in patients with heart failure. *Pharmacotherapy: The Journal of Human Pharmacology and Drug*  
25 *Therapy*, 38(4), 406-416.  
26
- 27 [38] Januzzi, J. L., Ahmad, T., Mulder, H., Coles, A., Anstrom, K. J., Adams, K. F., ... &  
28 O'Connor, C. M. (2019). Natriuretic peptide response and outcomes in chronic heart failure with  
29 reduced ejection fraction. *Journal of the American College of Cardiology*, 74(9), 1205-1217.  
30
- 31 [39] Bates, B. A., Akhabue, E., Nahass, M. M., Mukherjee, A., Hiltner, E., Rock, J., ... &  
32 Setoguchi, S. (2023). Validity of international classification of diseases (ICD)-10 Diagnosis  
33 codes for identification of acute heart failure hospitalization and heart failure with reduced  
34 versus preserved ejection fraction in a national medicare sample. *Circulation: Cardiovascular*  
35 *Quality and Outcomes*, 16(2), e009078.  
36  
37  
38  
39  
40  
41

1  
2

**Table 1. Baseline Clinical Characteristics**

|                                                    | Overall cohort<br>(n= 7667) |                        | No<br>discontinuation/reduction<br>in therapy (n=4121) |                       | Discontinuation or<br>reduction in therapy<br>(n=3546) |                     | p-value |
|----------------------------------------------------|-----------------------------|------------------------|--------------------------------------------------------|-----------------------|--------------------------------------------------------|---------------------|---------|
| Age (Median, IQR)                                  | 7667                        | 77 (67 - 84)           | 4121                                                   | 75 (66 -83)           | 3546                                                   | 78 (69 -86)         | <.0001  |
| Sex (% Female)                                     | 7667                        | 3963<br>(51.69%)       | 4121                                                   | 1926 (46.74%)         | 3546                                                   | 1778 (50.14%)       | 0.0029  |
| <b>Past Medical History</b>                        |                             |                        |                                                        |                       |                                                        |                     |         |
| Hypertension (%)                                   | 7667                        | 5772<br>(75.28%)       | 4121                                                   | 3092 (75.03%)         | 3546                                                   | 2680 (75.58%)       | 0.5793  |
| Dyslipidemia (%)                                   | 7667                        | 1991<br>(25.97%)       | 4121                                                   | 1081 (26.23)          | 3546                                                   | 910 (25.66%)        | 0.5712  |
| Insulin dependent Type 2 Diabetes Mellitus (%)     | 7667                        | 1090<br>(14,22%)       | 4121                                                   | 582 (14.12%)          | 3546                                                   | 508 (14.33%)        | 0.7995  |
| Non insulin dependent Type 2 Diabetes Mellitus (%) | 7667                        | 2086<br>(27.21%)       | 4121                                                   | 1127 (27.35%)         | 3546                                                   | 959 (27.04%)        | 0.7662  |
| Ischemic heart disease (%)                         | 7667                        | 3373<br>(43.99%)       | 4121                                                   | 1794 (43.53%)         | 3546                                                   | 1579 (44.53%)       | 0.3811  |
| Peripheral vascular disease (%)                    | 7667                        | 1055<br>(13.76%)       | 4121                                                   | 559 (13.56%)          | 3546                                                   | 496 (13.99%)        | 0.5920  |
| Cerebral vascular disease (%)                      | 7667                        | 856<br>(11.16%)        | 4121                                                   | 432 (10.48%)          | 3546                                                   | 424 (11.96%)        | 0.0410  |
| Chronic Kidney Disease (%)                         | 7667                        | 1282<br>(16.72%)       | 4121                                                   | 633 (15.36%)          | 3546                                                   | 649 (18.30%)        | 0.0006  |
| Atrial fibrillation/flutter (%)                    | 7667                        | 3166<br>(41.29%)       | 4121                                                   | 1567 (38.02%)         | 3546                                                   | 1599 (45.09%)       | <.0001  |
| History of HF admission within the past year (%)   | 7667                        | 5225<br>(68.15%)       | 4121                                                   | 2674 (64.89%)         | 3546                                                   | 2551 (71.94%)       | <.0001  |
| Charlson comorbidity index (mean, SD)              | 7667                        | 1.39<br>(1.20)         | 4121                                                   | 1.26 (1.14)           | 3546                                                   | 1.54 (1.25)         | <.0001  |
| RCRI score (mean, SD)                              | 7667                        | 1.89<br>(1.19)         | 4121                                                   | 1.85 (1.20)           | 3546                                                   | 1.94 (1.18)         | 0.0016  |
| <b>Surgery type</b>                                |                             |                        |                                                        |                       |                                                        |                     |         |
| Vascular (%)                                       | 7667                        | 316<br>(4,12%)         | 4121                                                   | 183 (4.44%)           | 3546                                                   | 133 (3.75%)         | 0.1297  |
| Intraperitoneal (%)                                | 7667                        | 2475<br>(32.28%)       | 4121                                                   | 1410 (34.21%)         | 3546                                                   | 1065 (30.03%)       | <.0001  |
| Intrathoracic (%)                                  | 7667                        | 110<br>(1.43%)         | 4121                                                   | 71 (1.72%)            | 3546                                                   | 39 (1.10%)          | 0.0222  |
| Pelvic (%)                                         | 7667                        | 699<br>(9.12%)         | 4121                                                   | 438 (10.63%)          | 3546                                                   | 261 (7.36%)         | <.0001  |
| Orthopedic (%)                                     | 7667                        | 4067<br>(53.05%)       | 4121                                                   | 2019 (48.99%)         | 3546                                                   | 2048 (57.76%)       | <.0001  |
| <b>Laboratory investigations</b>                   |                             |                        |                                                        |                       |                                                        |                     |         |
| Pre-operative Creatinine (median, umol/L)          | 5264                        | 99 (78 – 135)          | 2763                                                   | 97 (77 – 130)         | 2501                                                   | 101 (78 – 140)      | 0.0017  |
| Pre-operative BNP (median, ng/ml)                  | 676                         | 403<br>(188.5 – 781.5) | 299                                                    | 357 (174 – 670)       | 377                                                    | 434 (198 - 878)     | 0.0178  |
| Pre-operative NT-proBNP (median, ng/ml)            | 540                         | 1908<br>(652 – 4531.5) | 248                                                    | 1640.5 (568.5 – 4037) | 256                                                    | 2102 (728 – 4752.5) | 0.0763  |
| Post-operative creatinine (median,                 | 5838                        | 95 (74 – 130)          | 3044                                                   | 94 (73 – 127)         | 2794                                                   | 97 (75 – 135)       | 0.0054  |

|         |  |  |  |  |  |  |  |
|---------|--|--|--|--|--|--|--|
| μmol/L) |  |  |  |  |  |  |  |
|---------|--|--|--|--|--|--|--|

1 **Legend:** SD: standard deviation, IQR: Interquartile range, HF: Heart failure, BNP: Brain natriuretic peptide,

2

3

4 **Table 2 – Discontinuation of Guideline Directed Medical Therapy Following Major Non-**  
 5 **Cardiac Surgery**

|                    | Pre-operative use of GDMT (n= 7667) | 90-days following non-cardiac surgery |                                      |                                       |                                      |
|--------------------|-------------------------------------|---------------------------------------|--------------------------------------|---------------------------------------|--------------------------------------|
|                    |                                     | Continued all therapies (N= 5333)     | Discontinuation of 1 class (N= 1991) | Discontinuation of 2 classes (N= 304) | Discontinuation of 3 classes (N= 39) |
| On one therapy     | 5724 (74.66%)                       | 4131 (72.17%)                         | 1593 (27.83%)                        |                                       |                                      |
| On two therapies   | 1631 (21.27%)                       | 1019 (62.48%)                         | 333 (20.42%)                         | 279 (17.11%)                          |                                      |
| On three therapies | 312 (4.07%)                         | 183 (58.65%)                          | 65 (20.83%)                          | 25 (8.01%)                            | 39 (12.50%)                          |

6 **Legend:** GDMT: Guideline directed medical therapy; One therapy: Either beta blocker (BB) or renin angiotensin  
 7 system inhibitor (RASi), or mineralocorticoid receptor blocker (MRA); On two therapies: combination of RASI+  
 8 MRA, BB+ RASI, or MRA+BB; On three therapies: BB+MRA+RASi

9

10

11

12

13 **Table 3 – Dose Reduction of Guideline Directed Medical Therapy Following Major Non-**  
 14 **Cardiac Surgery**

|                    | Pre-operative use of GDMT (n= 7667) | 90-days following non-cardiac surgery |                                           |                                    |                                     |                                   |
|--------------------|-------------------------------------|---------------------------------------|-------------------------------------------|------------------------------------|-------------------------------------|-----------------------------------|
|                    |                                     | Continued all therapies (N=5333)      | Continued without dose reduction (N=4121) | Dose reduction of 1 class (N=1090) | Dose reduction of 2 classes (N=116) | dose reduction of 3 classes (N=6) |
| On one therapy     | 5724 (74.66%)                       | 4131 (72.17%)                         | 3225 (78.07%)                             | 906 (21.93%)                       |                                     |                                   |
| On two therapies   | 1631 (21.27%)                       | 1019 (62.48%)                         | 755 (74.09%)                              | 157 (15.41%)                       | 107 (10.50%)                        |                                   |
| On three therapies | 312 (4.07%)                         | 183 (58.65%)                          | 141 (77.05%)                              | 27 (14.75%)                        | 9 (4.92%)                           | 6 (3.28%)                         |

15 **Legend:** GDMT: Guideline directed medical therapy, One therapy: Either BB, RASI, or MRA, On Two therapies:  
 16 Combination of RASI+ MRA, BB+ RASI, or MRA+BB. On three therapies: BB+MRA+RASi

17

18

19

20

21

22

23

24

25

26

27

28

29

1 **Table 4. Factors associated with discontinuation or dose reduction in therapy following**  
 2 **non-cardiac surgery**  
 3

| Factors                                                  | Discontinuation or dose reduction in therapy (OR with 95% CI) | p value |
|----------------------------------------------------------|---------------------------------------------------------------|---------|
| Age from 66 to 75 vs Age ≤ 65                            | 1.209 (1.054 - 1.387)                                         | 0.0142  |
| Age from 76 to 85 vs Age ≤ 65                            | 1.424 (1.249 - 1.624)                                         | 0.0859  |
| Age > 85 vs Age ≤ 65                                     | 1.848 (1.594 - 2.143)                                         | <.0001  |
| Hypertension (Yes vs No)                                 | 0.912 (0.817 - 1.017)                                         | 0.0970  |
| Atrial fibrillation/flutter (Yes vs No)                  | 1.209 (1.098 - 1.331)                                         | 0.0001  |
| History of HF admission within the past year (Yes vs No) | 1.268 (1.143 - 1.407)                                         | <.0001  |
| Orthopedic (Yes vs No)                                   | 1.356 (1.233 - 1.491)                                         | <.0001  |
| Pre-Operative creatinine >177 μmol/L (Yes vs No)         | 1.230 (0.976 - 1.549)                                         | 0.0791  |
| BNP level 1 vs level 0                                   | 1.351 (0.885 - 2.060)                                         | 0.6625  |
| BNP level 2 vs level 0                                   | 1.507 (1.265 - 1.795)                                         | 0.0595  |
| NT-proBNP level 1 vs level 0                             | 1.668 (1.000 - 2.783)                                         | 0.1255  |
| NT-proBNP level 2 vs level 0                             | 1.236 (1.015 - 1.505)                                         | 0.7883  |
| Post-Operative creatinine >177 μmol/L (Yes vs No)        | 1.266 (1.009 - 1.590)                                         | 0.0417  |

4 **Legend:** HF: heart failure, BNP: Brain natriuretic peptide  
 5

1  
 2 **Table 5 –Discontinuation or Dose Reduction in Therapy on HF Hospitalization or All-cause**  
 3 **Mortality at 1-year**

| <b>Heart Failure Hospitalization or All-Cause Mortality</b> |                                                        |                                                     |                               |                              |
|-------------------------------------------------------------|--------------------------------------------------------|-----------------------------------------------------|-------------------------------|------------------------------|
|                                                             | <b>No discontinuation or dose reduction in therapy</b> | <b>Discontinuation or dose reduction in therapy</b> |                               |                              |
|                                                             | <b>Events n = (%)</b>                                  | <b>Events n = (%)</b>                               | <b>Unadjusted OR (95% CI)</b> | <b>Adjusted OR* (95% CI)</b> |
| On HF therapy at baseline (one, two or three therapies)     | 1947 (47.25%) among 4121                               | 1835 (51.75%) among 3546                            | 1.197 (1.094, 1.310)          | 1.140 (1.039, 1.251)         |
| One therapy                                                 | 1533 (47.53%) among 3225                               | 1292 (51.70%) among 2499                            | 1.181 (1.064, 1.312)          | 1.126 (1.010, 1.254)         |
| Two therapies                                               | 363 (48.08%) among 755                                 | 448 (51.14%) among 876                              | 1.130 (0.930, 1.373)          | 1.073 (0.879, 1.311)         |
| Three therapies                                             | 51 (36.17%) among 141                                  | 95 (55.56%) among 171                               | 2.206 (1.396, 3.484)          | 1.900 (1.176, 3.069)         |

4 **Legend:** GDMT: Guideline directed medical therapy, HF: Heart failure, OR: Odds ratio, CI: Confidence Interval  
 5 **\*Adjusted odds ratio:** age, sex, components of revised cardiac risk index risk score and Charlson comorbidity  
 6 index.  
 7
